# Supplementary material for: Risk assessment indicators and brachial-ankle pulse wave velocity to predict atherosclerotic cardiovascular disease
Source: PubMed Central journal article supplement — Medicine (Baltimore). 2022 Aug 12;101(32):e29609. doi: 10.1097/MD.0000000000029609 (PMC9371549; doi:10.1097/md.0000000000029609), 2022-08-12

**(Supplemental Materials)**

**Risk assessment indicators and brachial-ankle pulse wave velocity to predict  
atherosclerotic cardiovascular disease**

Hung-Ju Ko, MT<sup>1</sup>, Chuan-Chuan Liu, PhD<sup>2,3,4\*</sup>, Po-Jui Hsu, MT<sup>5</sup>, Kuang-Chun Hu, PhD<sup>1,4,7</sup>,  
Chung-Lieh Hung, PhD<sup>6,8</sup>, Lo-Yip Yu, MD<sup>1,7</sup>, Yun-Chieh Huang, MBA<sup>1</sup>, Shou-Chuan Shih,  
MD<sup>1,3,7</sup>

<sup>1</sup>Health Evaluation Center, Mackay Memorial Hospital, Taipei, Taiwan

<sup>2</sup>The Institute of Health Policy and Management, College of Public Health, National Taiwan  
University, Taipei, Taiwan

<sup>3</sup> Department of Physiology, Mackay Memorial Hospital, Taipei, Taiwan

<sup>4</sup>Mackay Junior College of Medicine, Nursing, and Management, Taipei City, Taiwan

<sup>5</sup>Division of Laboratory Medicine, Mackay Memorial Hospital, Taipei, Taiwan

<sup>6</sup>Mackay Medical College, Taipei, Taiwan

<sup>7</sup>Division of Gastroenterology, Department of Internal Medicine, Mackay Memorial  
Hospital, Taipei, Taiwan

<sup>8</sup>Division of Cardiology, Department of Internal Medicine, MacKay Memorial Hospital,  
Taipei City, Taiwan

**\*Corresponding author:**

Chuan-Chuan Liu, PhD

Department of Physiology, Mackay Memorial Hospital, Taipei, Taiwan

16F, No.92, Sec. 2, Chung-Shan North Road, Taipei 10449, Taiwan

Tel: +886-2-25433535 ext. 3398; Fax: 25418720

E-mail: [carrie@mmh.org.tw](mailto:carrie@mmh.org.tw)

## **Supplemental Figure Legends**

### **Supplementary Figure 1: ASCVD risk comparing age, BMI, SBP, DBP, triglycerides, fasting glucose, HbA1c, and creatinine levels**

ASCVD = atherosclerotic cardiovascular disease, BMI= body mass index, SBP= systolic blood pressure, DBP= diastolic blood pressure, HbA1c= hemoglobin A1c

### **Supplementary Figure 2 : ASCVD risk comparing LbaPWV, RbaPWV, LABI, RABI, MS, FRS, eGFR, and vascular age**

LbaPWV= left brachial-ankle pulse wave velocity, RbaPWV= right brachial-ankle pulse wave velocity, LABI= left ankle brachial index, RABI= right ankle brachial index , MS= Metabolic syndrome, FRS= Framingham risk score, eGFR= estimated Glomerular filtration rate.

Abbreviations same as Figure 1.

### **Supplementary Figure 3 : ASCVD risk comparing carotid plaques, vascular age, actual age, and hazard ratios**

Abbreviations same as Figure 1.

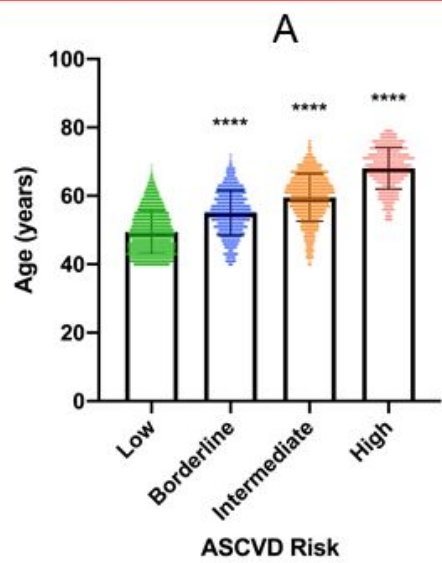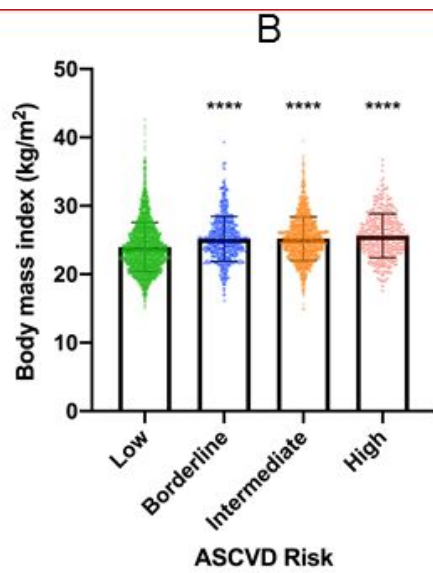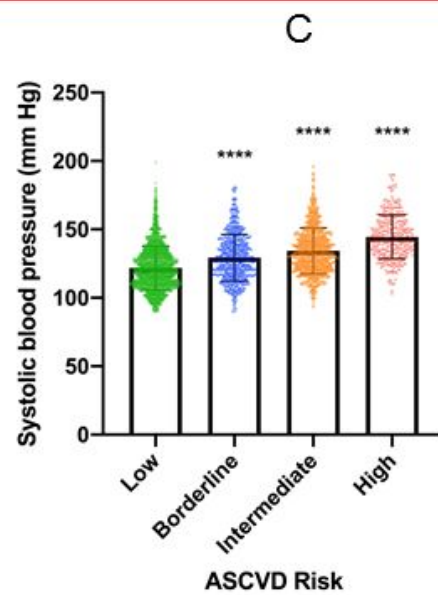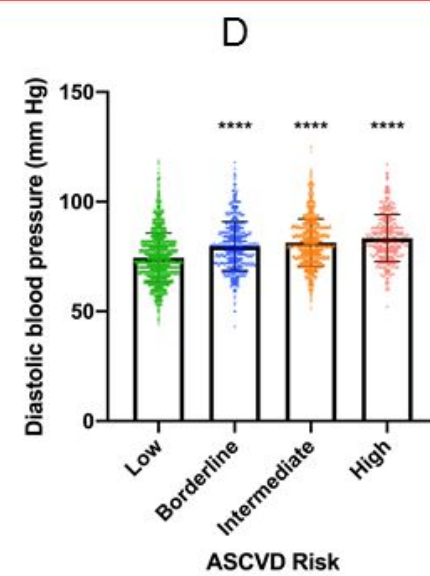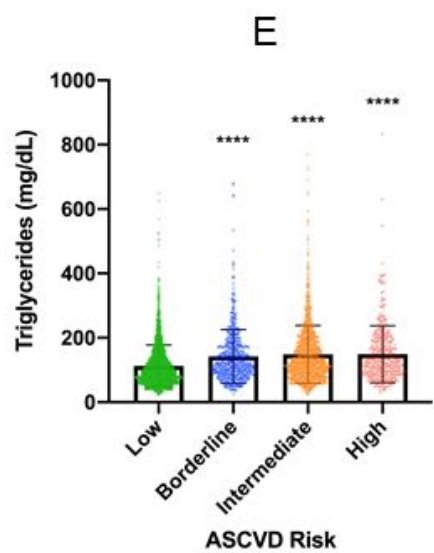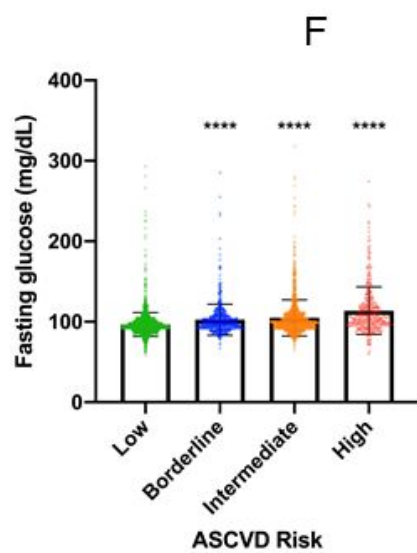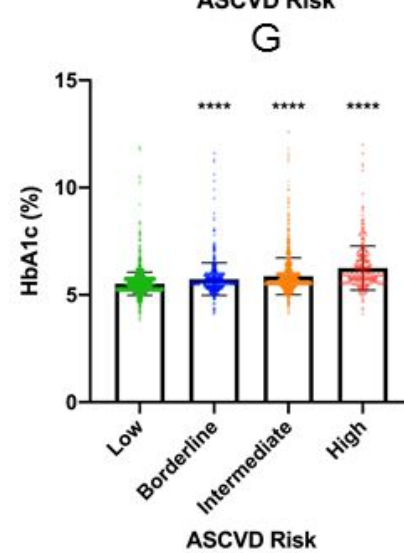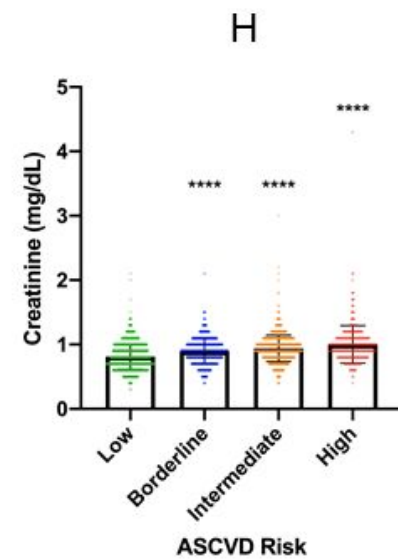

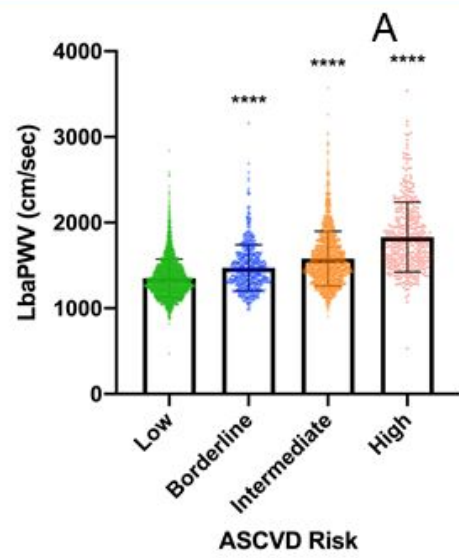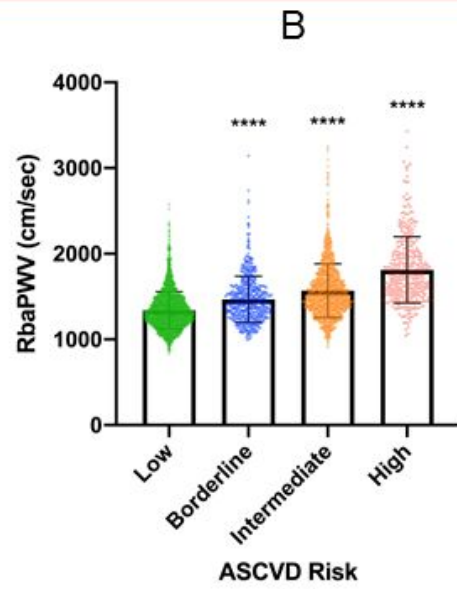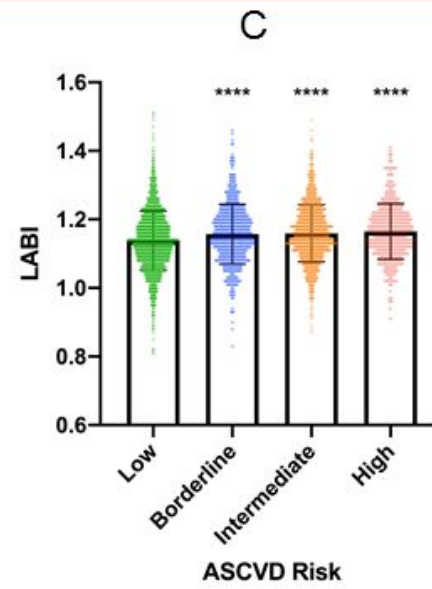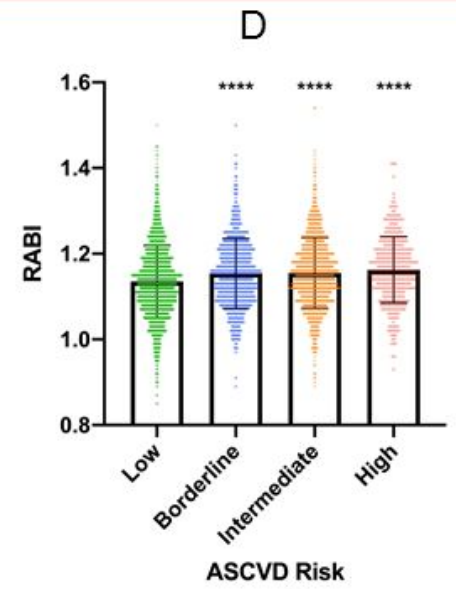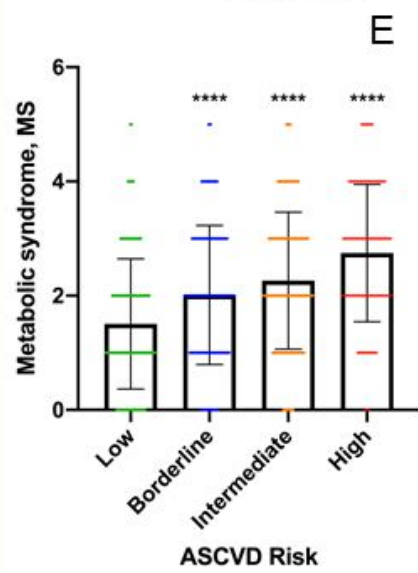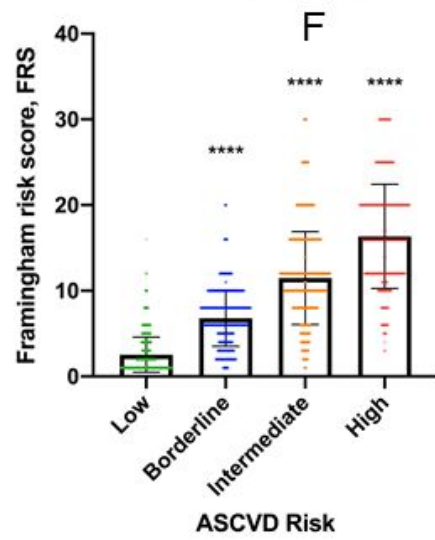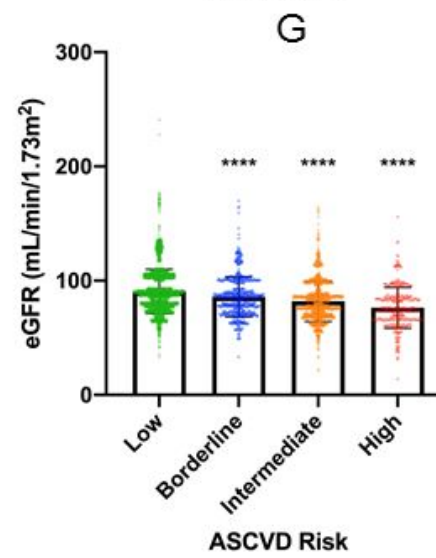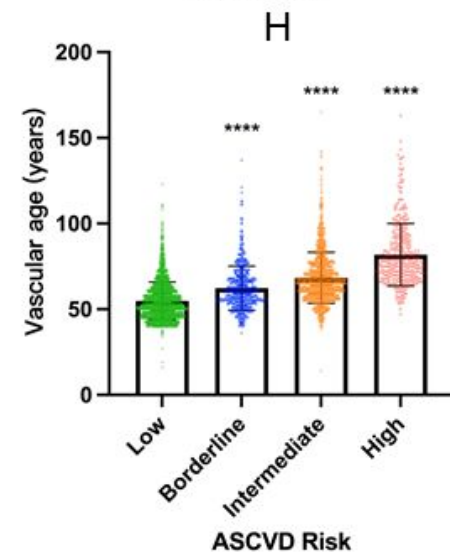

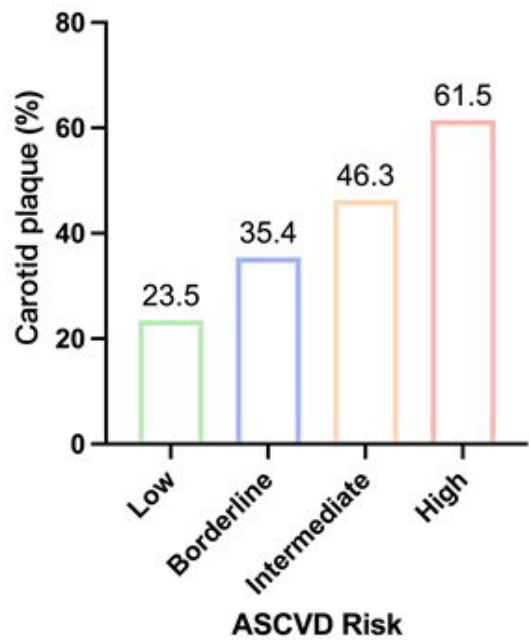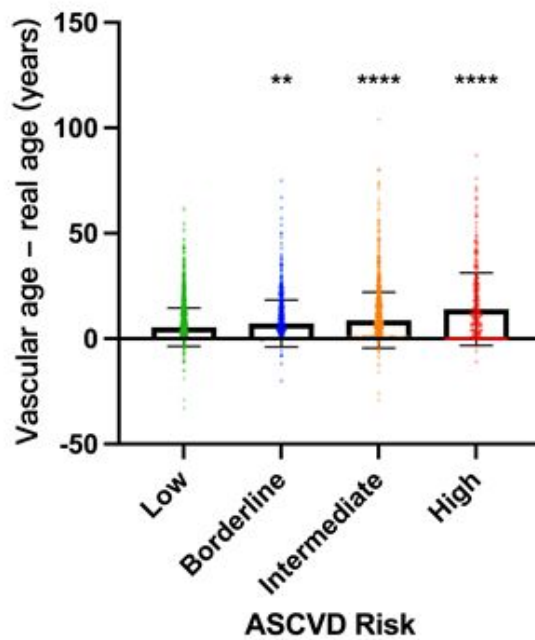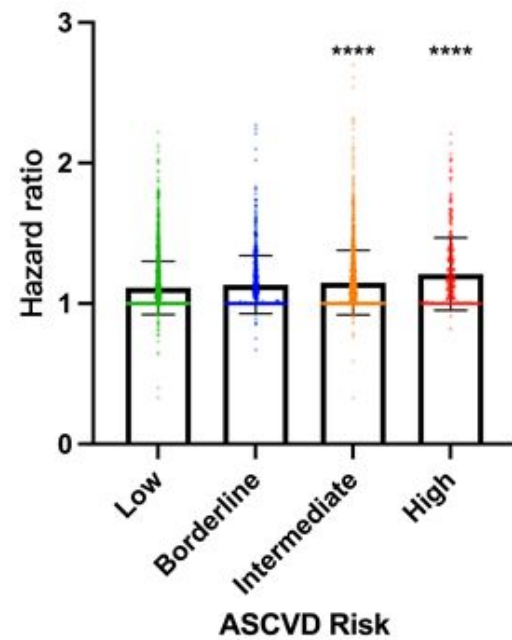

Supplement: medi-101-e29609-s001.pdf [file medi-101-e29609-s001.pdf]
